# Supplementary material
Source: Royal Society of Chemistry journal article supplement (doi:10.1039/d6nj00263c)
Supplement: d6nj00263c1.pdf [file d6nj00263c1.pdf]

## Theoretical investigation of the functional and photocatalytic properties of $\text{Li}_2\text{TiX}_6$ ( $\text{X} = \text{Cl}, \text{Br}, \text{I}$ ) double perovskites using Density Functional Theory

Lalrin Puia,<sup>a,b</sup> Laltha kimi,<sup>a,b</sup> Angela Chinggelkim,<sup>a,b</sup> R. Zosiamliana,<sup>a,b</sup> Lalthum Hima,<sup>a,b</sup> Celestine Lalengmawia,<sup>a,b</sup> Lalrin Thara,<sup>a</sup> Shivraj Gurung,<sup>a</sup> and Lalhriat Zuala<sup>\*a</sup>

<sup>a</sup> Physical Sciences Research Centre (PSRC), Department of Physics, Pachhunga University College, Aizawl, 796001, India,

<sup>b</sup> Department of Physics, Mizoram University, Aizawl, 796004, India

\* Email:hriatamail@gmail.com

### Phonon calculation:

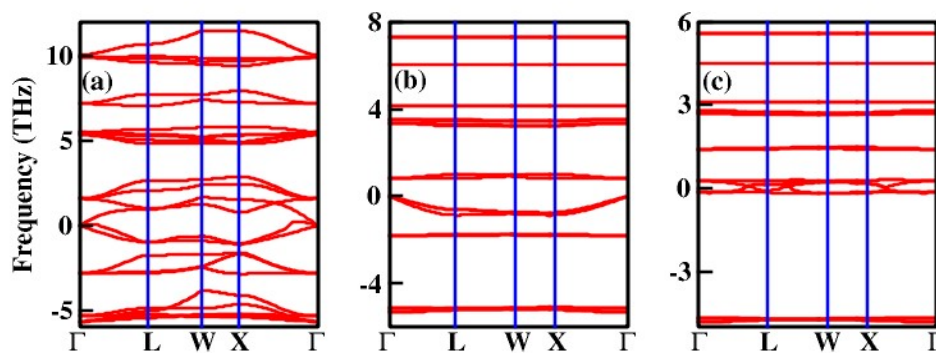

Figure S1: Phonon dispersion (a)  $\text{Li}_2\text{TiCl}_6$ , (b)  $\text{Li}_2\text{TiBr}_6$  and (c)  $\text{Li}_2\text{TiI}_6$

The calculated phonon dispersion curves for the cubic phase given in the Figure S1, exhibit soft-mode instabilities, characterized by imaginary frequencies. These modes signify a dynamical instability of the  $\text{Fm}\bar{3}\text{m}$  symmetry at 0K, a hallmark of vacancy-ordered double perovskites (VODPs) where the high-symmetry framework is often a saddle point on the potential energy surface. Physically, these instabilities correspond to symmetry-breaking displacive transitions, typically driven by the collective tilting of  $\text{BX}_6$  octahedra or subtle distortions within the vacancy-ordered sublattice (Mahi et al., 2024). While these negative branches suggest instability in a static 0K limit, they are frequently renormalized by anharmonic effects at finite temperatures as demonstrated by Chen et al. using the Temperature-Dependent Effective Potential (TDEP) method (Hellman et al., 2013), the inclusion of anharmonic phonon renormalization (APRN)(Guo & Guo, 2023) can effectively stabilize such frameworks (Chen et al., 2024). Similar behaviour has been noticed in  $\text{Cs}_2\text{SnX}_6$  ( $\text{X} = \text{Br}, \text{I}$ ) and  $\text{Cs}_2\text{MoI}_6$ , where imaginary components observed at 0 K vanish under ambient conditions as we increase the temperature, this confirms the material's structural integrity at room temperature(Jong et al., 2019, 2022) (Ahmed et al., 2023). Furthermore, research by Faizan et al. reinforces that these  $T=0\text{K}$  instabilities are often artifacts of neglecting thermal expansion and ionic fluctuations, both of which restore dynamical stability at  $T = 300\text{K}$  (Faizan et al., 2022). Consequently, the observed soft modes in our system are indicative of a temperature-driven phase stabilization rather than a fundamental lack of structural viability.

## Reference

1. Mahi, Tasnim Ahmed and Sabuj, Imran Hossain and Hossain, Quazi Shafayat and Nishat, Sadiq Shahriyar and Jahan, Shirin Akter and Khan, Mohammed Nazrul Islam and Akhtar, Umme Sarmeen and Shahriar Bashar, Muhammad and Islam, Dipa and Sultan, Md. Zakir and Jahan, Sharmin and Hossain, Khandker Saadat and Ahmed, Imtiaz, *The Journal of Physical Chemistry C* (2024)
2. Hellman O, Steneteg P, Abrikosov I , Simak S *Physical Review B - Condensed Matter and Materials Physics* (2013) 87
3. Guo T, Guo D, *Physics Letters, Section A: General, Atomic and Solid State Physics* (2023) 467
4. Chen, Xingyu, Zhou, Jialim, Luo, Jun, Zhang, Jiawei, Qiu, Pengfei, Shi, Xun, *Small* (2024) 20
5. Jong, Un Gi, Yu, Chol Jun, Kye, Yun Hyok, Choe, Song Hyok, Kim, Jin Song, Choe, Yong Guk, *Physical Review B* (2019) 99
6. Jong U, Yu C, Kye, Choe S, Kim J, Choe Y, *Physical Review B* (2019) 99
7. Jong U, Kim Y, Ri C, Kye Y, Pak C, Cottenier S, Yu C, *Chemical Communications* (2022) 58 4223-4226
8. Ahmed B, Tahir M, Dahshan A, Ali A, Sagir M, Hassan M, *Optik* (2023) 171473
9. Faizan, Muhammad and Wang, Xinjiang and Abdelmohsen, Shaimaa A. M. and Bhamu, K. C. and Sappati, Subrahmanyam and Laref, Amel and Muhammad, Nisar and Mushtaq, Muhammad and Abdelbacki, Ashraf M. M. and Khenata, Rabah, *Energy and Fuels* (2022) 36 7065-7074
